# Supplementary material for: Chemical Profiling and Biological Activity of Psydrax dicoccos Gaertn
Source: MDPI journal article supplement (doi:10.3390/molecules28207101), 2023-10-15
Supplement: s1 [file s1]

## Supplementary Materials

# Chemical Profiling and Biological Activity of *Psydrax dicoccos* Gaertn

Kamaraj Veeramuthu <sup>1</sup>, Vishal Ahuja <sup>2,3</sup>, Pushparaj Annadurai <sup>4</sup>, Daniel A. Gideon <sup>5</sup>, Balamurugan Sundarrajan <sup>1</sup>, Marius Emil Rusu <sup>6,\*</sup>, Vinothkanna Annadurai <sup>7</sup> and Kandavel Dhandayuthapani <sup>8,\*</sup>

- <sup>1</sup> Thanthai Periyar Government Arts and Science College (Autonomous), Affiliated to Bharathidasan University, Tiruchirappalli 620023, Tamil Nadu, India
- <sup>2</sup> University Institute of Biotechnology, Chandigarh University, Mohali 140413, Punjab, India
- <sup>3</sup> University Centre for Research & Development, Chandigarh University, Mohali 140413, Punjab, India
- <sup>4</sup> C.P.R. Environmental Education Center, 1 Eldams Road, Alwarpet, Chennai 600018, Tamil Nadu, India
- <sup>5</sup> Department of Biochemistry, St. Joseph College, Bangalore 560025, Karnataka, India
- <sup>6</sup> Department of Pharmaceutical Technology and Biopharmaceutics, Faculty of Pharmacy, Iuliu Hatieganu University of Medicine and Pharmacy, 400012 Cluj-Napoca, Romania
- <sup>7</sup> School of Food and Biological Engineering, Jiangsu University, Zhenjiang 212013, China
- <sup>8</sup> Department of Botany, Government Arts College for Men, Nandanam, Affiliated to University of Madras, Chennai 600035, Tamil Nadu, India
- \* Correspondence: rusu.marius@umfcluj.ro (M.E.R.); kandavel1976@gmail.com (K.D.)

**Table S1.** Qualitative phytochemical screening of *P. dicoccos* leaf powder extracts.

| Test          | Aqueous | Methanol | Ethanol | Acetone | Chloroform | Hexane |
|---------------|---------|----------|---------|---------|------------|--------|
| Triterpenoid  | +       | +        | +       | +       | -          | +      |
| Sugar         | +       | +        | -       | +       | -          | -      |
| Flavonoid     | -       | +        | +       | -       | +          | -      |
| Catachin      | -       | -        | -       | -       | -          | -      |
| Saponin       | +       | -        | +       | -       | -          | -      |
| Tannin        | +       | +        | +       | +       | -          | +      |
| Anthraquinone | -       | -        | -       | -       | -          | -      |
| Amino acid    | +       | +        | +       | +       | +          | +      |
| Sterol        | +       | +        | -       | -       | +          | +      |
| Carbohydrate  | +       | +        | +       | +       | +          | -      |

**Table S2.** Quantitative analysis of methanolic *P. dicoccos* leaf extract.

| Test                   | Amount of compounds present (mg/g) |
|------------------------|------------------------------------|
| Chlorophyll a          | 8.07 ± 0.2                         |
| Chlorophyll b          | 10.45 ± 0.1                        |
| Total chlorophyll      | 14.48 ± 0.4                        |
| Total carotenoids      | 2.18 ± 2.4                         |
| Total sugar            | 257 ± 0.2                          |
| Total protein          | 1.2 ± 1.1                          |
| Total lipids           | 182 ± 2.0                          |
| Total free amino acids | 0.9 ± 0.1                          |
| Total phenolics        | 81.11 ± 1.1                        |
| Total tannin           | 51.09 ± 2.2                        |
| Total flavonoids       | 159 ± 2.8                          |

**Table S3.** Anti-bacterial activity profiling of methanolic *P. dicoccos* leaf extract.

| Antibiotic<br>(µg/disc)     | Zones represented as radius (mm) |                |                          |                  |                    |                          |                           |
|-----------------------------|----------------------------------|----------------|--------------------------|------------------|--------------------|--------------------------|---------------------------|
|                             | Leaf extract<br>conc. (mg/mL)    | <i>E. coli</i> | <i>P.<br/>aeruginosa</i> | <i>S. aureus</i> | <i>S. flexneri</i> | <i>K.<br/>pneumoniae</i> | <i>S.<br/>typhimurium</i> |
| -                           | 6                                | 1.2±0.609      | 0.3±0.795                | -                | 0.4±0.410          | 0.4±0.193                | -                         |
| -                           | 7                                | 0.7±0.552      | 0.3±0.728                | -                | 0.3±0.447          | 0.6±0.217                | -                         |
| -                           | 8                                | 1.2±0.453      | 0.7±0.704                | 0.0±0.332        | 1.2±0.456          | 0.3±0.234                | -                         |
| -                           | 9                                | 1.1±0.537      | 0.4±0.757                | 0.9±0.270        | 0.7±0.297          | 0.3±0.259                | -                         |
| -                           | 10                               | 1.9±0.611      | 2.3±0.757                | 0.4±0.038        | 0.6±0.225          | 0.6±0.287                | -                         |
| Amikacin (10<br>µg)         | -                                | 12±2.1         | 13±1.3                   | 10±1.2           | 11±0.8             | 12±1.8                   | 13±1.5                    |
| Chlorampheni<br>col (10 µg) | -                                | 11±2.1         | 6±1.3                    | 3±1.0            | 4±1.8              | 5±1.8                    | 8±0.8                     |
| Bacitracin<br>(10 µg)       | -                                | NE             | NE                       | NE               | NE                 | NE                       | NE                        |
| Penicillin G<br>(30 µg)     | -                                | NE             | NE                       | NE               | NE                 | NE                       | NE                        |
| Methicillin<br>(5 µg)       | -                                | NE             | NE                       | NE               | NE                 | NE                       | NE                        |

NE – not effective. *Escherichia coli* (*E. coli*); *Pseudomonas aeruginosa* (*P. aeruginosa*); *Staphylococcus aureus* (*S. aureus*); *Shigella flexneri* (*S. flexneri*); *Klebsiella pneumoniae* (*K. pneumoniae*); *Salmonella typhimurium* (*S. typhimurium*).

**Table S4.** GC-MS study of methanolic *P. dicoccos* leaf extract.

| Peak | Retention time | Name                                                                                               | Area     | Retention Index | Molecular formula                                              | Molecular weight | Docking results |
|------|----------------|----------------------------------------------------------------------------------------------------|----------|-----------------|----------------------------------------------------------------|------------------|-----------------|
| 1    | 11.603         | Benzenecarboxylic acid                                                                             | 38374943 | 0               | C <sub>7</sub> H <sub>6</sub> O <sub>2</sub>                   | 122              | -               |
| 2    | 12.049         | 2,3-Dihydro-Benzofuran                                                                             | 712375   | 1036            | C <sub>8</sub> H <sub>8</sub> O                                | 120              | +               |
| 3    | 14.13          | 2-Methoxy-4-Vinylphenol                                                                            | 804363   | 0               | C <sub>9</sub> H <sub>10</sub> O <sub>2</sub>                  | 150              | -               |
| 4    | 19.952         | 4-Methyloxy-6-methylcoumarin                                                                       | 939973   | 0               | C <sub>11</sub> H <sub>10</sub> O <sub>3</sub>                 | 190              | -               |
| 5    | 20.078         | Cyclopenta[C]Pyran-4-Carboxylic Acid, 7-Methyl-, Methyl Ester                                      | 13844412 | 1402            | C <sub>11</sub> H <sub>10</sub> O <sub>3</sub>                 | 190              | -               |
| 6    | 20.71          | Megastigmatrienone                                                                                 | 1655818  | 1454            | C <sub>13</sub> H <sub>18</sub> O                              | 190              | +               |
| 7    | 21.09-21.464   | 1,3,4,5-Tetrahydrocyclohexanecarboxylic Acid                                                       | 8979051  | 0               | C <sub>7</sub> H <sub>12</sub> O <sub>6</sub>                  | 192              | -               |
| 10   | 21.954         | 3,4-Dihydrocoumarin, 7,8-dimethyl-                                                                 | 4580894  | 1618            | C <sub>11</sub> H <sub>12</sub> O <sub>2</sub>                 | 176              | -               |
| 11   | 22.075         | (E)-2,6-Dimethoxy-4-(prop-1-en-1-yl)phenol                                                         | 2247222  | 0               | C <sub>11</sub> H <sub>14</sub> O <sub>3</sub>                 | 194              | -               |
| 12   | 22.41          | 1H,3H-Pyrano[3,4-c]pyran-1-one, 5-ethenyl-6-(.beta.-D-glucopyranosyloxy)-5,6-dihydro-, (5R-trans)- | 9452624  | 3042            | C <sub>16</sub> H <sub>20</sub> O <sub>9</sub>                 | 356              | -               |
| 13   | 22.603         | Mome Inositol                                                                                      | 9435268  | 1647            | C <sub>7</sub> H <sub>14</sub> O <sub>6</sub>                  | 194              | -               |
| 14   | 22.81          | (E)-4-(3-Hydroxyprop-1-en-1-yl)-2-methoxyphenol                                                    | 4232584  | 1653            | C <sub>10</sub> H <sub>12</sub> O <sub>3</sub>                 | 180              | -               |
| 15   | 23.202         | Tetradecanoic Acid                                                                                 | 772831   | 1769            | C <sub>14</sub> H <sub>28</sub> O <sub>2</sub>                 | 228              | -               |
| 16   | 24.533         | Neophytadiene                                                                                      | 1078998  | 0               | C <sub>20</sub> H <sub>38</sub>                                | 278              | -               |
| 17   | 24.95-25.265   | 3,7,11,15-Tetramethyl-2-hexadecen-1-ol                                                             | 290870   | 2045            | C <sub>20</sub> H <sub>40</sub> O                              | 296              | -               |
| 19   | 26.029         | Methyl palmitate                                                                                   | 1002064  | 1878            | C <sub>17</sub> H <sub>34</sub> O <sub>2</sub>                 | 270              | -               |
| 20   | 26.298         | 17-Pentatriacontene                                                                                | 467597   | 3508            | C <sub>35</sub> H <sub>70</sub>                                | 490              | -               |
| 21   | 26.67          | n-Hexadecanoic acid                                                                                | 7886533  | 1968            | C <sub>16</sub> H <sub>32</sub> O <sub>2</sub>                 | 256              | -               |
| 22   | 28.698         | Linoleic acid                                                                                      | 489690   | 2093            | C <sub>19</sub> H <sub>34</sub> O <sub>2</sub>                 | 294              | -               |
| 23   | 28.79          | 9,12,15-Octadecatrienoic acid, methyl ester, (Z,Z,Z)-                                              | 1458002  | 2101            | C <sub>19</sub> H <sub>32</sub> O <sub>2</sub>                 | 292              | -               |
| 24   | 28.964         | Phytol                                                                                             | 753451   | 2045            | C <sub>20</sub> H <sub>40</sub> O                              | 269              | -               |
| 25   | 29.321         | 9,12-Octadecadienoic acid (Z,Z)-                                                                   | 2128485  | 2183            | C <sub>18</sub> H <sub>32</sub> O <sub>2</sub>                 | 280              | -               |
| 26   | 29.431         | Dichloroacetic acid                                                                                | 9177045  | 2042            | C <sub>15</sub> H <sub>24</sub> Cl <sub>2</sub> O <sub>2</sub> | 306              | -               |
| 27   | 29.773         | Octadecanoic acid                                                                                  | 2242046  | 2167            | C <sub>18</sub> H <sub>36</sub> O <sub>2</sub>                 | 284              | -               |
| 28   | 31.012         | 2-Oxa-3-azabicyclo[2.2.2]oct-5-ene, 3-benzoyl-                                                     | 1262046  | 1755            | C <sub>13</sub> H <sub>13</sub> NO <sub>2</sub>                | 215              | -               |
| 29   | 31.861         | 2-Octyl benzoate                                                                                   | 955456   | 1692            | C <sub>15</sub> H <sub>22</sub> O <sub>2</sub>                 | 234              | +               |
| 30   | 34.602         | Hexadecanoic acid, 2-hydroxy-1-(hydroxymethyl)ethyl ester                                          | 1836502  | 2498            | C <sub>19</sub> H <sub>38</sub> O <sub>4</sub>                 | 330              | -               |

|    |        |                     |         |      |                                                |     |   |
|----|--------|---------------------|---------|------|------------------------------------------------|-----|---|
| 31 | 34.881 | Oxirane, hexadecyl- | 399182  | 1901 | C <sub>18</sub> H <sub>36</sub> O              | 268 | - |
| 32 | 36.923 | Linolenic acid      | 1773973 | 2721 | C <sub>21</sub> H <sub>36</sub> O <sub>4</sub> | 352 | - |
| 33 | 37.203 | Stearic acid        | 888524  | 2681 | C <sub>21</sub> H <sub>42</sub> O <sub>4</sub> | 358 | - |
| 34 | 38.32  | Squalene            | 4467855 | 2914 | C <sub>30</sub> H <sub>50</sub>                | 410 | - |
| 35 | 39.984 | delta-Tocopherol    | 992557  | 2923 | C <sub>27</sub> H <sub>46</sub> O <sub>2</sub> | 402 | - |

**Table S5.** LC-MS study of methanolic *P. dicoccos* leaf extract.

| M/Z ratio | Compounds                                            | Retention Time | Retention Index | Docking studies |
|-----------|------------------------------------------------------|----------------|-----------------|-----------------|
| 160.9     | Caffeoyl-O-hexoside                                  | 16.93          | 58              | –               |
| 162.9     | 5-O-p-coumaroylshikimic acid (5-p-CoSA)              | 21.13          | 45              | –               |
| 169       | Quercetin                                            | 35.84          | 62              | –               |
| 191.1     | (E)Catechin–(E)Gallocatechin a                       | 27.56          | 41              | –               |
| 195.8     | Rhamnosylhexosyl luteolin                            | 24.21          | 54              | –               |
| 197.8     | Kaempferol                                           | 26.65          | 32              | +               |
| 199       | 4-O-p-coumaroylshikimic acid (3-p-CoSA)              | 22.92          | 86              | –               |
| 274.3     | 5-O-p-coumaroylshikimic acid (5-p-CoSA)              | 21.13          | 42              | –               |
| 377.2     | Quercetin rutinoside                                 | 28.9           | 59              | +               |
| 593.3     | Rhamnosylhexosyl methyl quercetin                    | 24.67          | 76              | –               |
| 696.4     | (E)Catechin–(E)Catechin–<br>(E)Catechin–(E)Catechina | 30.54          | 59              | –               |
| 717.3     | 4-O-p-coumaroylshikimic acid (3-p-CoSA)              | 22.92          | 70              | –               |
| 740.4     | (E)Catechin–(E)Catechin–<br>(E)Catechin–(E)Catechina | 30.54          | 83              | –               |

|       |                                                                                    |       |    |   |
|-------|------------------------------------------------------------------------------------|-------|----|---|
| 761.4 | (E)-3-(3,4-diacetoxy-5-methoxyphenyl)acryl-4-O-p-coumaroyl-5-O-caffeoylquinic acid | 37.5  | 74 | - |
| 849.4 | (E)Catechin-(E)Catechin-(E)Catechin a                                              | 21.42 | 48 | - |

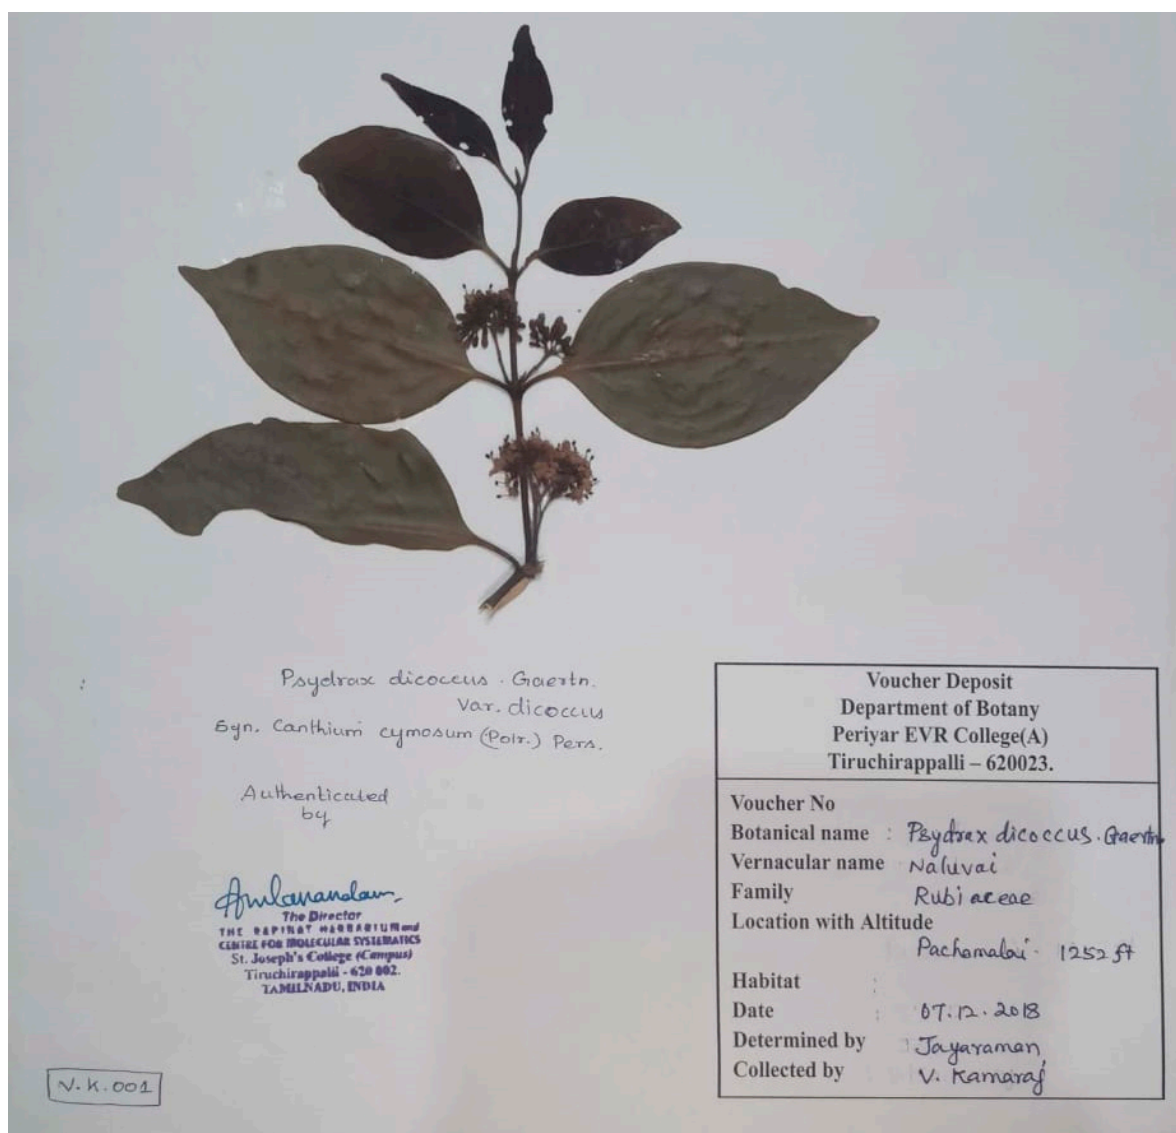

Figure S1. *P. dicoccus* botanical sample (Specimen #VK001).
